# Supplementary material for: Controllable fabrication of single-crystalline, ultrafine and high-silica hierarchical ZSM-5 aggregates via solid-like state conversion
Source: Royal Society of Chemistry journal article supplement (doi:10.1039/c7ra03962j), 2017-01-01
Supplement: c7ra03962j1.pdf [file c7ra03962j1.pdf]

## Supporting Information for

# Controllable fabrication of single-crystalline, ultrafine and high-silica hierarchical ZSM-5 aggregates via solid-like state conversion

Hongyao Li,\* Yaquan Wang, Fanjun Meng, Fei Gao, Chao Sun, Chunyang Fan, Xiao Wang, Shuhai Wang

Key Laboratory for Green Chemical Technology of the Ministry of Education, School of Chemical Engineering and Technology, Tianjin University, Tianjin 300072, China.

\*Corresponding author: Tel.: +86-22-23507881; Fax: +86-22-23507881; E-mail address : lhy0501@163.com

### Table of Contents

**Tables.....S2**

**Figures .....S3**

## 1. Tables

**Table S1 Synthesis conditions and textural properties of zeolite samples.**

| Sample                | SiO <sub>2</sub> /Al <sub>2</sub> O <sub>3</sub> | Seed/SiO <sub>2</sub> | HTAB/SiO <sub>2</sub> | RC <sup>1</sup> [%] | S <sub>ext</sub> <sup>2</sup> (m <sup>2</sup> g <sup>-1</sup> ) | S <sub>int</sub> <sup>2</sup> (m <sup>2</sup> g <sup>-1</sup> ) | V <sub>meso</sub> <sup>2</sup> (cm <sup>3</sup> g <sup>-1</sup> ) | V <sub>meso</sub> <sup>2</sup> (cm <sup>3</sup> g <sup>-1</sup> ) | V <sub>meso</sub> <sup>2</sup> (cm <sup>3</sup> g <sup>-1</sup> ) |
|-----------------------|--------------------------------------------------|-----------------------|-----------------------|---------------------|-----------------------------------------------------------------|-----------------------------------------------------------------|-------------------------------------------------------------------|-------------------------------------------------------------------|-------------------------------------------------------------------|
| HA-167-2S-5H          | 167                                              | 0.02                  | 0.05                  | 107                 | 409                                                             | 201                                                             | 0.1                                                               | 0.29                                                              | 0.19                                                              |
| HA-200-2S-5H          | 200                                              | 0.02                  | 0.05                  | 108                 | 406                                                             | 213                                                             | 0.09                                                              | 0.27                                                              | 0.18                                                              |
| HA-250-2S-5H          | 250                                              | 0.02                  | 0.05                  | 109                 | 399                                                             | 229                                                             | 0.08                                                              | 0.25                                                              | 0.17                                                              |
| HA-313-2S-5H          | 313                                              | 0.02                  | 0.05                  | 110                 | 399                                                             | 225                                                             | 0.08                                                              | 0.24                                                              | 0.16                                                              |
| HA-167-0.5S-5H        | 167                                              | 0.005                 | 0.05                  | 212                 | 393                                                             | 117                                                             | 0.13                                                              | 0.25                                                              | 0.12                                                              |
| HA-167-2S-5H          | 167                                              | 0.02                  | 0.05                  | 107                 | 409                                                             | 201                                                             | 0.1                                                               | 0.29                                                              | 0.19                                                              |
| HA-167-4S-5H          | 167                                              | 0.04                  | 0.05                  | 106                 | 410                                                             | 157                                                             | 0.12                                                              | 0.27                                                              | 0.15                                                              |
| HA-167-6S-5H          | 167                                              | 0.06                  | 0.05                  | 212                 | 418                                                             | 143                                                             | 0.13                                                              | 0.29                                                              | 0.16                                                              |
| HA-167-2S-1H          | 167                                              | 0.02                  | 0.01                  | 81                  | 266                                                             | 100                                                             | 0.08                                                              | 0.23                                                              | 0.15                                                              |
| HA-167-2S-3H          | 167                                              | 0.02                  | 0.03                  | 100                 | 378                                                             | 202                                                             | 0.09                                                              | 0.24                                                              | 0.15                                                              |
| HA-167-2S-5H          | 167                                              | 0.02                  | 0.05                  | 107                 | 409                                                             | 201                                                             | 0.1                                                               | 0.29                                                              | 0.19                                                              |
| HA-167-2S-7H          | 167                                              | 0.02                  | 0.07                  | 102                 | 388                                                             | 180                                                             | 0.10                                                              | 0.23                                                              | 0.13                                                              |
| C-ZSM-5               | 167                                              | 0.02                  | 0                     | 100                 | 311                                                             | 167                                                             | 0.06                                                              | 0.22                                                              | 0.16                                                              |
| C <sub>1</sub> -ZSM-5 | 167                                              | -----                 | -----                 |                     | 330                                                             | 147                                                             | 0.07                                                              | 0.20                                                              | 0.13                                                              |

**Table S2 NH<sub>3</sub>-TPD results of the selected samples.**

| Sample                | Weak acid                         | Strong acid                       | Total acid                        | Strong/Weak |
|-----------------------|-----------------------------------|-----------------------------------|-----------------------------------|-------------|
|                       | (mmol NH <sub>3</sub> per g cat.) | (mmol NH <sub>3</sub> per g cat.) | (mmol NH <sub>3</sub> per g cat.) |             |
| HA-167-2S-5H          | 0.097                             | 0.128                             | 0.225                             | 1.32        |
| HA-167-2S-7H          | 0.116                             | 0.125                             | 0.241                             | 1.08        |
| C-ZSM-5               | 0.163                             | 0.134                             | 0.297                             | 0.82        |
| C <sub>1</sub> -ZSM-5 | 0.055                             | 0.146                             | 0.201                             | 2.65        |

**Table S3 Acidity of the ZSM-5 zeolites determined by Py-IR spectroscopy at 25 °C.**

| Zeolite               | B acid | L acid | B/L  |
|-----------------------|--------|--------|------|
|                       | (a.u.) | (a.u.) |      |
| HA-167-2S-5H          | 0.117  | 0.0109 | 10.7 |
| HA-167-2S-7H          | 0.113  | 0.0120 | 9.4  |
| C-ZSM-5               | 0.106  | 0.0277 | 3.8  |
| C <sub>1</sub> -ZSM-5 | 0.103  | 0.0430 | 2.4  |

Brønsted and Lewis acidities were quantified according to the integrated areas of the absorbance peaks at 1539 and at 1448 cm<sup>-1</sup>, respectively.

**Table S4** Product distribution of MTP reaction over the HA-167-2S-5H, HA-167-2S-7H, C-ZSM-5 and C<sub>1</sub>-ZSM-5 catalysts measured at steady state condition.

| Catalyst              | Conversion (%) | Selectivity (C-mol.%)         |                               |                               |                               |                             | C <sub>2</sub> <sup>a</sup> -C <sub>4</sub> <sup>a</sup> | P/E |
|-----------------------|----------------|-------------------------------|-------------------------------|-------------------------------|-------------------------------|-----------------------------|----------------------------------------------------------|-----|
|                       |                | C <sub>1</sub> - <sup>a</sup> | C <sub>2</sub> H <sub>4</sub> | C <sub>3</sub> H <sub>6</sub> | C <sub>4</sub> H <sub>8</sub> | C <sub>5</sub> <sup>b</sup> |                                                          |     |
| HA-167-2S-5H          | 100            | 3.7                           | 5.5                           | 40.1                          | 22.9                          | 27.8                        | 68.5                                                     | 7.3 |
| HA-167-2S-7H          | 100            | 2.9                           | 5.3                           | 40.3                          | 22.9                          | 28.6                        | 68.5                                                     | 7.6 |
| C-ZSM-5               | 99.3           | 5.3                           | 11.1                          | 33.1                          | 17.2                          | 33.3                        | 61.4                                                     | 3.0 |
| C <sub>1</sub> -ZSM-5 | 99.0           | 4.6                           | 5.9                           | 38.7                          | 21.4                          | 29.4                        | 66.0                                                     | 6.6 |
| C <sub>2</sub> -ZSM-5 | 99.6           | 6.1                           | 9.9                           | 31.9                          | 17.9                          | 34.6                        | 59.7                                                     | 3.2 |

a C<sub>1</sub>-C<sub>4</sub> saturated hydrocarbons.

b C<sub>5</sub> and higher hydrocarbons.

**Table S5.** The textural properties of HA-ZSM-5 samples synthesized at different crystallization times.

| crystallization times (h) | RC <sup>a</sup> [%] | S <sub>BET</sub> <sup>b</sup> (cm <sup>2</sup> g <sup>-1</sup> ) | S <sub>ext</sub> <sup>c</sup> (cm <sup>2</sup> g <sup>-1</sup> ) | V <sub>micro</sub> <sup>d</sup> (cm <sup>3</sup> g <sup>-1</sup> ) | V <sub>poro</sub> <sup>e</sup> (cm <sup>3</sup> g <sup>-1</sup> ) | V <sub>meso</sub> <sup>f</sup> (cm <sup>3</sup> g <sup>-1</sup> ) |
|---------------------------|---------------------|------------------------------------------------------------------|------------------------------------------------------------------|--------------------------------------------------------------------|-------------------------------------------------------------------|-------------------------------------------------------------------|
| 6                         | 0                   | 119                                                              | 104                                                              | 0.006                                                              | 0.99                                                              | 0.98                                                              |
| 12                        | 0                   | 121                                                              | 102                                                              | 0.007                                                              | 0.91                                                              | 0.90                                                              |
| 18                        | 0                   | 124                                                              | 94                                                               | 0.01                                                               | 0.65                                                              | 0.64                                                              |
| 24                        | 61                  | 168                                                              | 106                                                              | 0.03                                                               | 0.52                                                              | 0.49                                                              |
| 30                        | 103                 | 366                                                              | 109                                                              | 0.12                                                               | 0.24                                                              | 0.12                                                              |
| 36                        | 111                 | 393                                                              | 173                                                              | 0.10                                                               | 0.21                                                              | 0.11                                                              |

## 2. Figures

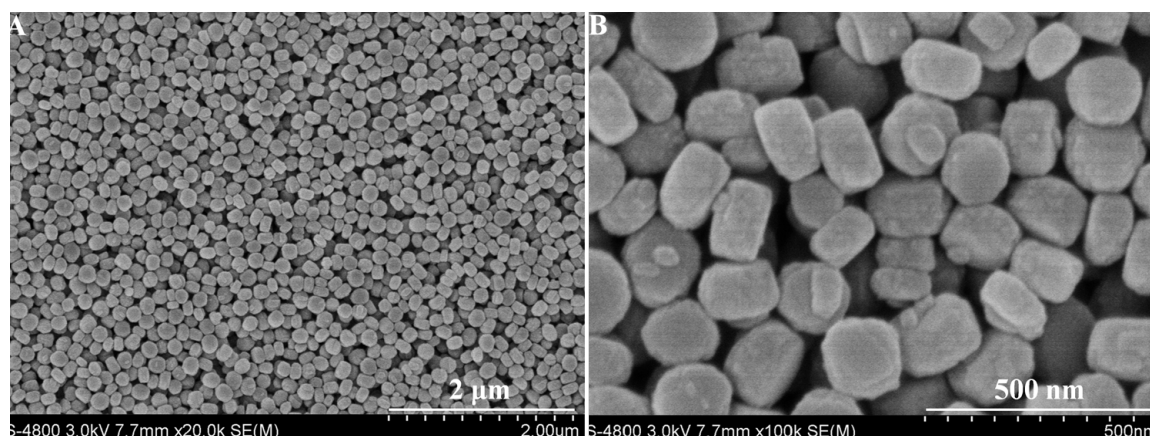

Fig. S1 SEM images for S-1 seeds (A) low magnification, (B) high magnification.

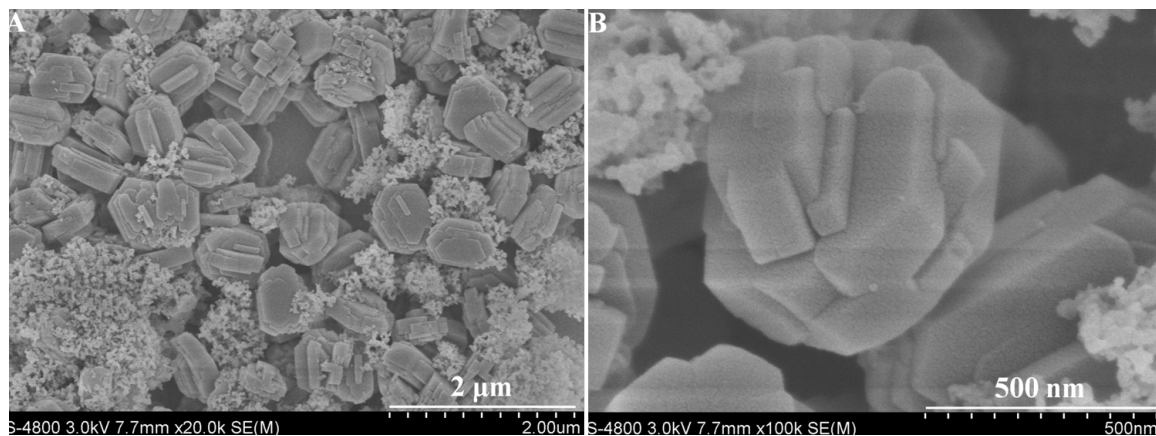

Fig. S2 SEM images for C-ZSM-5 zeolite (A) low magnification, (B) high magnification.



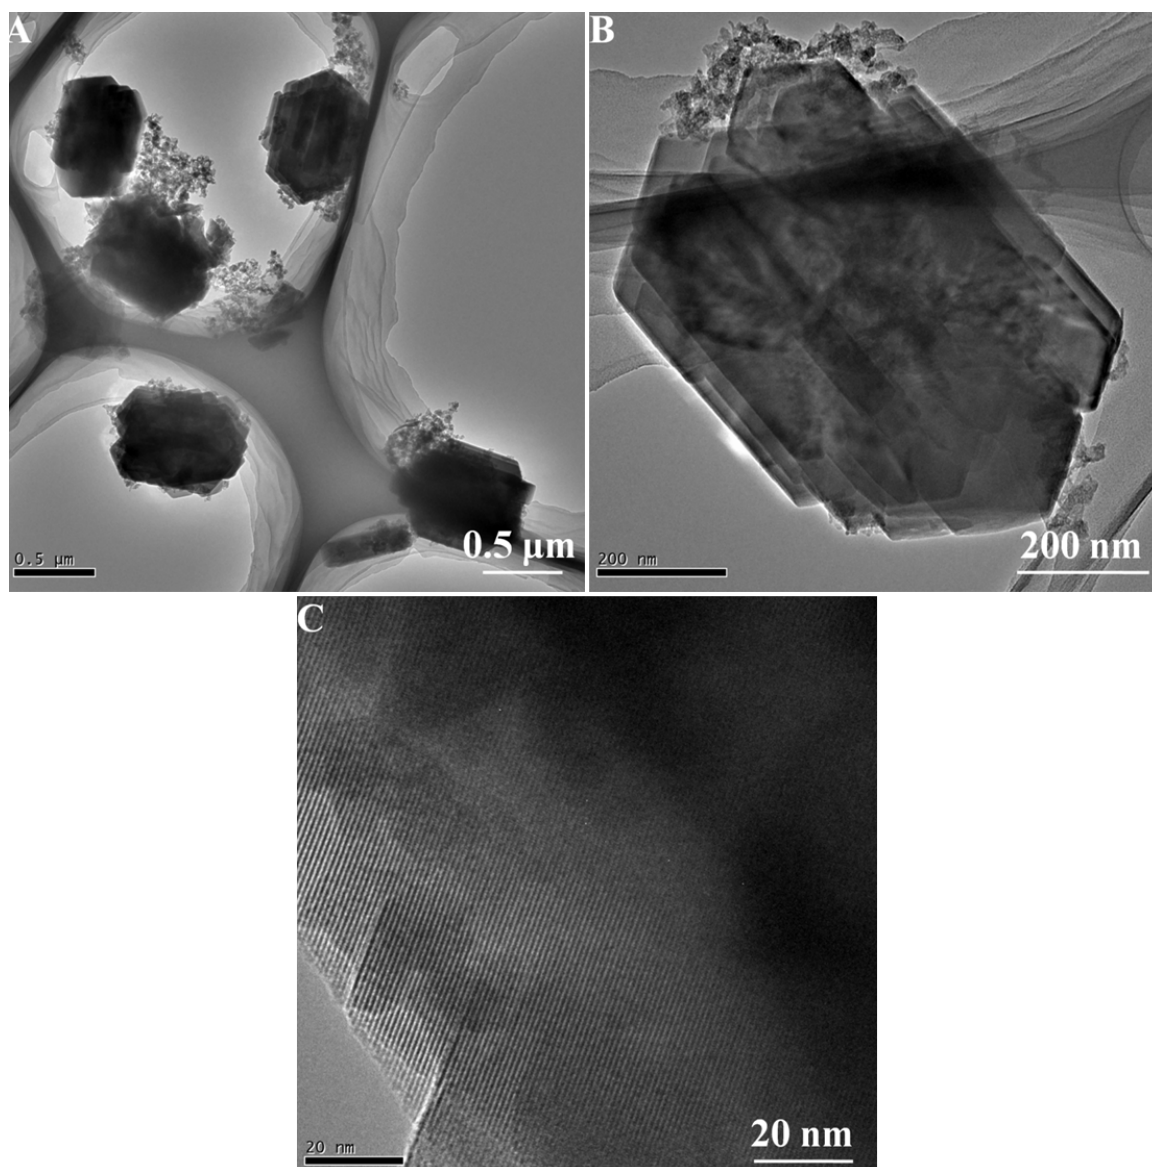

Fig. S3 TEM images for C-ZSM-5 zeolite (A) low magnification, (B) and (C) high magnification.

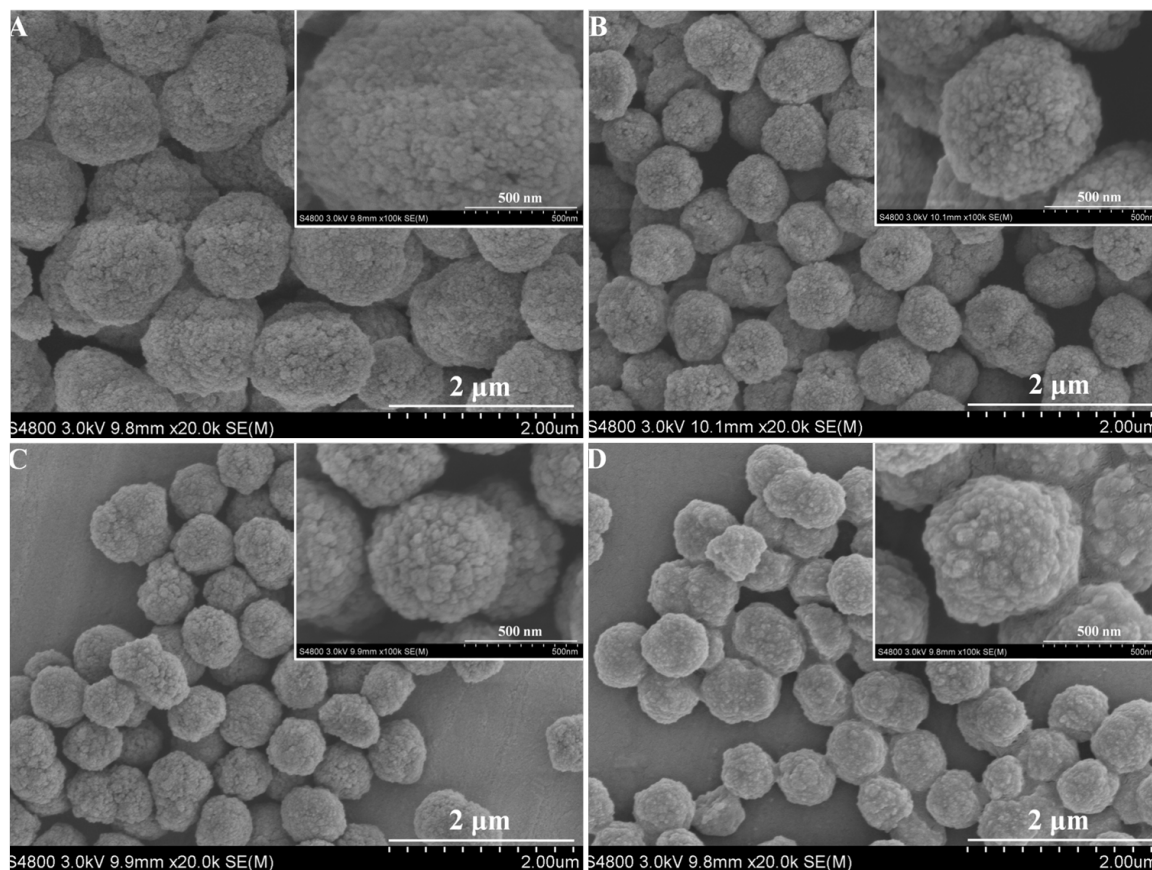

Fig. S4 SEM images of the HA-ZSM-5 zeolites with different  $\text{SiO}_2/\text{Al}_2\text{O}_3$  ratios  
(A) HA-167-2S-5H; (B) HA-200-2S-5H; (C) HA-250-2S-5H; (D) HA-313-2S-5H.

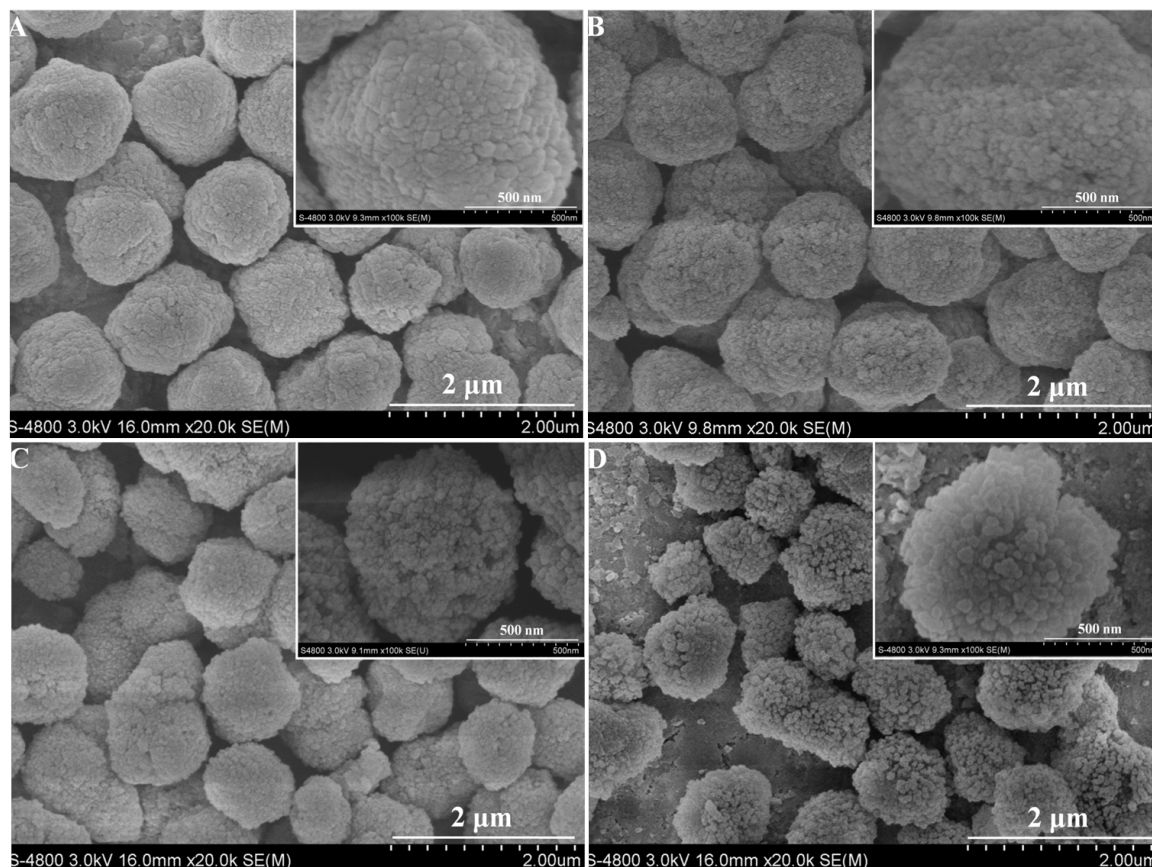

Fig. S5 SEM images of the HA-ZSM-5 zeolites with different Seed/ SiO<sub>2</sub> ratios  
(A) HA-167-0.5S-5H; (B) HA-167-2S-5H; (C) HA-167-4S-5H; (D) HA-167-6S-5H.

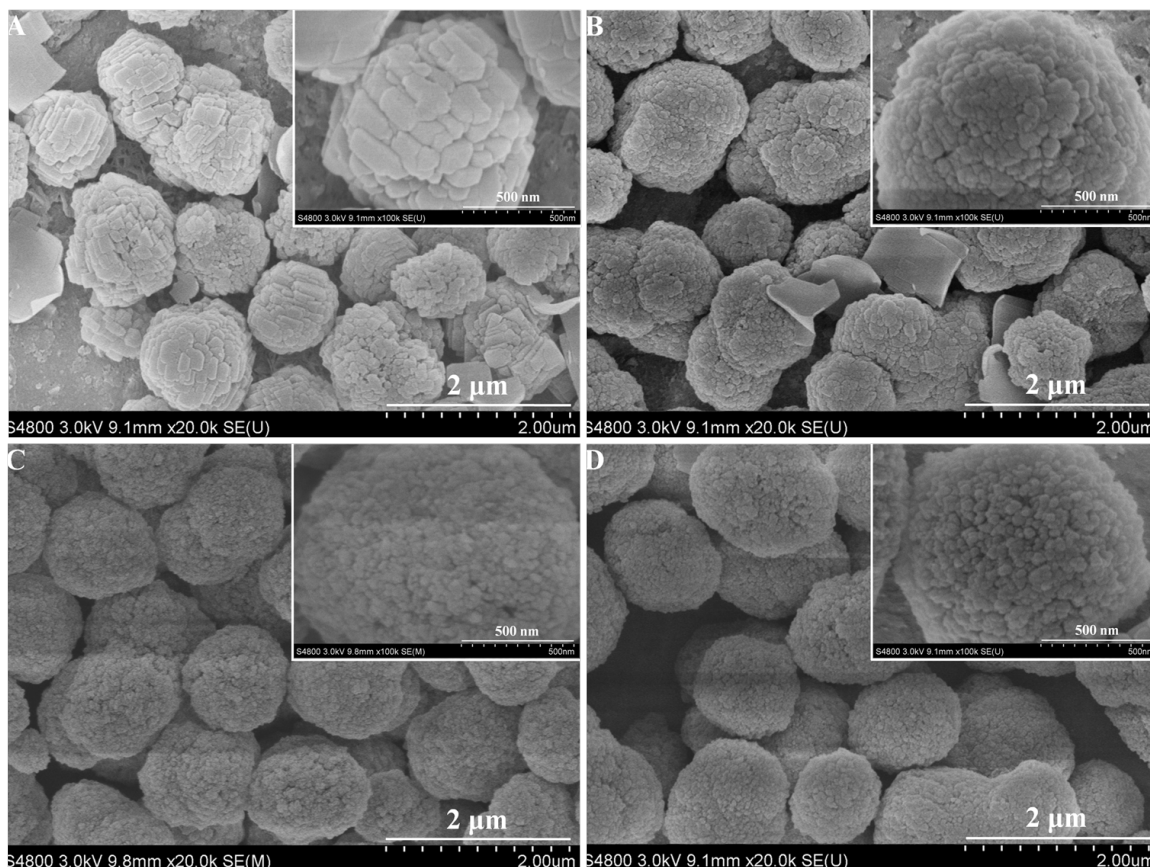

Fig. S6 SEM images of the HA-ZSM-5 zeolites with different HTAB/ SiO<sub>2</sub> ratios. (A) HA-167-2S-1H; (B) HA-167-2S-3H; (C) HA-167-2S-5H; (D) HA-167-2S-7H.

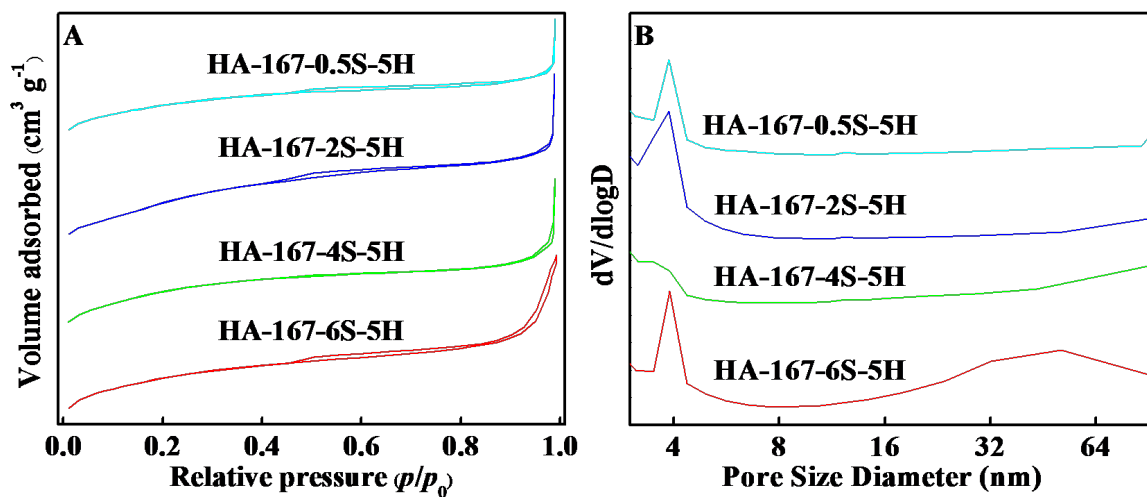

Fig. S7 N<sub>2</sub> adsorption-desorption isotherms (A) and PSD curves (B) of the HA-ZSM-5 zeolites prepared with different Seed/ SiO<sub>2</sub> ratios.

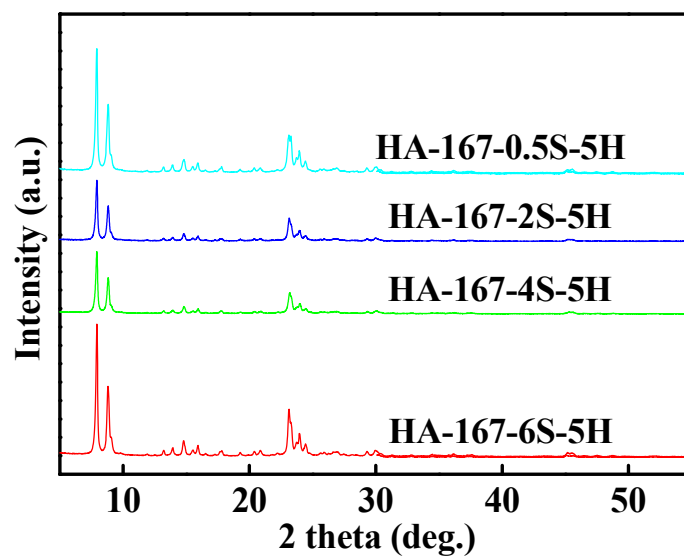

Fig. S8 XRD patterns of HA-ZSM-5 zeolites synthesized with different seed/SiO<sub>2</sub> ratios.

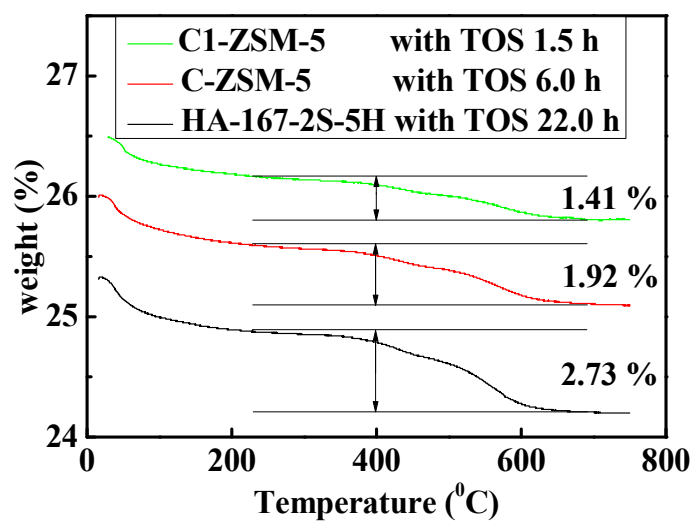

Fig. S9 TG curves of C<sub>1</sub>-ZSM-5, C-ZSM-5 and HA-167-2S-5H catalysts in the MTP reaction test at 470 °C after deactivation.

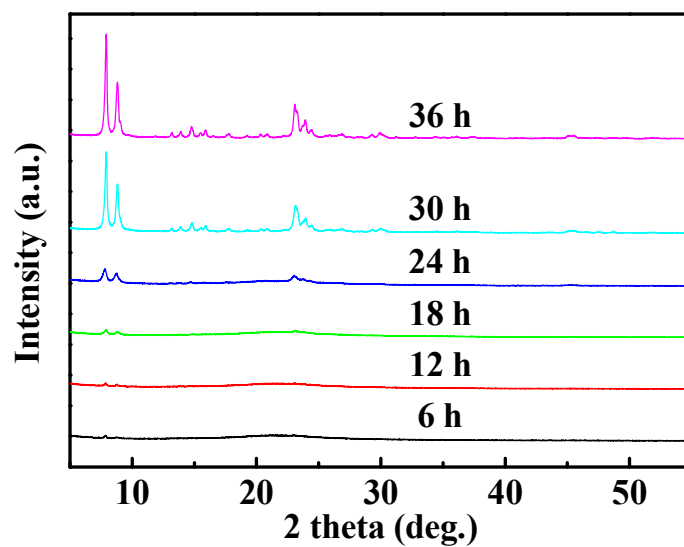

Fig. S10 The XRD patterns of HA-ZSM-5 samples prepared at different crystallization time.

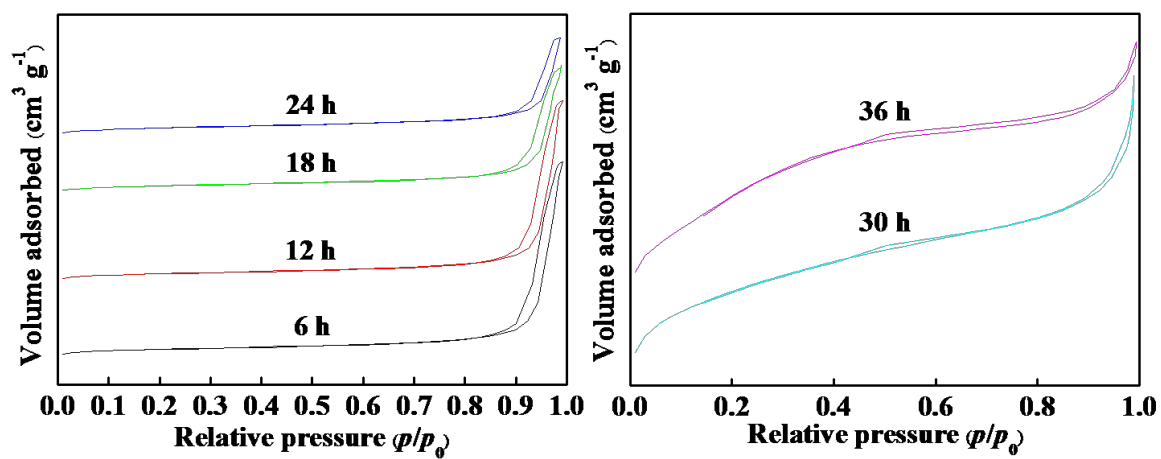

Fig.S11  $N_2$  adsorption-desorption isotherms of HA-ZSM-5 samples prepared at different crystallization times.

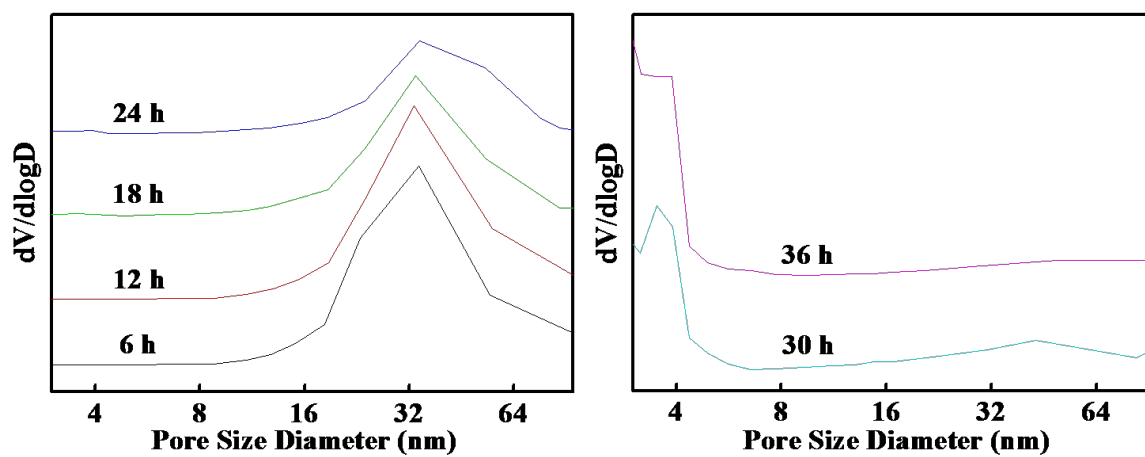

Fig.S12 Pore size distributions of HA-ZSM-5 samples prepared at different crystallization times.
